# Supplementary material for: Relative Impact of Birth Weight and Early Growth on Neonatal Mortality in Puppies
Source: MDPI journal article supplement (doi:10.3390/ani13121928), 2023-06-09
Supplement: s1 [file s1]

**Table S1.** Birth weight thresholds defining low and normal birth weight puppies by breed, based on the risk of mortality over the two first months of life (CART analysis).

| <b>Breed</b>                  | <b>Birth weight threshold (in grams)</b> |
|-------------------------------|------------------------------------------|
| Pomeranian                    | 136                                      |
| West Highland White Terrier   | 157                                      |
| Cavalier King Charles Spaniel | 179                                      |
| Beagle                        | 233                                      |
| Bulldog                       | 262                                      |
| Golden Retriever              | 296                                      |
| Wirehaired Vizsla             | 329                                      |
| Beauceron                     | 361                                      |
| Leonberger                    | 366                                      |
| Greyhound                     | 395                                      |
| Braque d'Auvergne             | 465                                      |
| Newfoundland                  | 466                                      |
| Maltese                       | 115.5                                    |
| Shetland Sheepdog             | 132.5                                    |
| Lhasa Apso                    | 141.5                                    |
| Yorkshire Terrier             | 144.5                                    |
| English Cocker Spaniel        | 157.5                                    |
| Shih Tzu                      | 159.5                                    |
| French Bulldog                | 185.5                                    |
| Australian Shepherd Dog       | 239.5                                    |
| Labrador Retriever            | 304.5                                    |
| German Shepherd Dog           | 403.5                                    |
| Boxer                         | 435.5                                    |
| Berner Sennenhund             | 500.5                                    |
